# Supplementary material for: A Randomized, Double-Blind, Placebo-Controlled Study of a Novel Pantothenic Acid-Based Dietary Supplement in Subjects with Mild to Moderate Facial Acne
Source: PubMed Central journal article supplement — Dermatol Ther (Heidelb). 2014 May 16;4(1):93–101. doi: 10.1007/s13555-014-0052-3 (PMC4065280; doi:10.1007/s13555-014-0052-3), 2014-05-16
Supplement: 13555_2014_52_MOESM1_ESM.pdf [file 13555_2014_52_MOESM1_ESM.pdf]

- Facial lesions due to acne can affect up to 95% of teens and adults and patients with acne commonly report poorer quality of life.
- The role of nutritional agents and dietary supplements on skin health have been implicated.
- Pantothenic acid has been shown to regulate epidermal barrier function and keratinocytes.
- This randomized, placebo controlled clinical study of 41 subjects in the USA demonstrated that a pantothenic acid-based supplement was safe, tolerable and effectively reduced facial acne lesions after 12 weeks.
- Subjects with improvement in facial acne lesions also demonstrated improved quality of life parameters as measured by a validated questionnaire.

This summary slide represents the opinions of the authors. Sponsorship for this study was provided by Avilan Marketing LLC (Brooklyn, NY, USA). Article processing charge was provided by Nutraceutical Medical Research (New York, NY, USA). For a full list of acknowledgments and conflicts of interest for all authors of this article, please see the full text online. Copyright © The Authors 2014. Creative Commons Attribution Noncommercial License (CC BY-NC).
